## RESEARCH ARTICLE

# Internally coupled middle ears enhance the range of interaural time differences heard by the chicken

Christine Köppl<sup>1,2,\*</sup>

## ABSTRACT

Interaural time differences (ITDs) are one of several principal cues for localizing sounds. However, ITDs are in the sub-millisecond range for most animals. Because the neural processing of such small ITDs pushes the limit of temporal resolution, the precise ITD range for a given species and its usefulness – relative to other localization cues – has been a powerful selective force in the evolution of the neural circuits involved. Birds and other non-mammals have internally coupled middle ears working as pressure-difference receivers that may significantly enhance ITDs, depending on the precise properties of the interaural connection. Here, the extent of this internal coupling was investigated in chickens, specifically under the same experimental conditions as typically used in investigations of the neurophysiology of ITD-coding circuits, i.e. with headphone stimulation and skull openings. Cochlear microphonics (CM) were recorded simultaneously from both ears of anesthetized chickens under monaural and binaural stimulation, using pure tones from 0.1 to 3 kHz. Interaural transmission peaked at 1.5 kHz at a loss of only –5.5 dB; the mean interaural delay was 264  $\mu$ s. CM amplitude was strongly modulated as a function of ITD, confirming significant interaural coupling. The ‘ITD heard’ derived from the CM phases in both ears showed enhancement, compared with the acoustic stimuli, by a factor of up to 1.8. However, the experimental conditions impaired interaural transmission at low frequencies (<1 kHz). I identify factors that need to be considered when interpreting neurophysiological data obtained under these conditions and relating them to the natural free-field condition.

**KEY WORDS:** Auditory, Hearing, Sound localization, Bird, Avian, ITD

## INTRODUCTION

Localization of sounds originating in the environment is performed without effort by humans and many animals. This apparent ease belies the complexity of the underlying physical and neurophysiological processes. There are a number of principal cues – interaural time and level differences in azimuth and spectral composition in elevation – but their availability and relative usefulness are highly dependent on the size of the animal and its frequency range of hearing (e.g. Köppl, 2009). In the low-frequency range, typically up to a few kilohertz, interaural time differences (ITDs) are the best cue to azimuth (e.g. Hartmann, 1999). However,

for all but the largest animals, ITDs remain below 1 ms and thus represent a challenge for the nervous system to encode timing and determine the interaural difference with appropriate precision. Although it is undisputed that humans and other animals with good low-frequency hearing rely on ITDs for sound localization in azimuth (e.g. Brown and May, 2005), the neural mechanisms underlying this are less clear. Several mechanisms of encoding ITDs have been suggested, with good experimental evidence for each, in different species and sometimes even in the same species (reviews in Ashida and Carr, 2011; Grothe et al., 2010; Joris and Yin, 2007; Vonderschen and Wagner, 2014). This naturally raises the question as to the constraints and specific conditions that might have favored the evolution of different mechanisms (Carr and Christensen-Dalsgaard, 2015, 2016; Grothe and Pecka, 2014; Köppl, 2009). The precise range of ITDs available to an animal is an important argument in this discussion, but wrong assumptions have often been made about this.

The acoustic ITD appears to be straightforward to predict if the size of the head is known and the head is approximated as a sphere (Kuhn, 1977). At low frequencies, the maximal ITD arising from a sound source 90 deg to one side is  $3r/v$  (where  $r$  is the radius of the sphere and  $v$  is the speed of sound). However, actual measurements in a range of animal species have since shown that the acoustic ITD between the outside of both eardrums is always larger than this prediction, typically by a factor of about 1.5 (cat: Tollin and Koka, 2009; guinea pig: Sterbing et al., 2003; gerbil: Maki and Furukawa, 2005; chinchilla: Jones et al., 2011; barn owl: Hausmann et al., 2010; Poganiatz et al., 2001; von Campenhausen and Wagner, 2006). Recently, this was also confirmed for the chicken (Schnyder et al., 2014; estimated from phase measurements shown in their fig. S9). Thus, classic assumptions about the ITD range experienced by an animal and based on a spherical head model need to be revised upwards.

There is more to this issue. Both mammalian and avian species are prominent animal models for investigating the neural processing mechanisms of ITDs. However, little attention has been paid in this context to a salient difference in their middle ears that has a potentially crucial impact on ITD processing. Unlike mammalian ears, the middle ears of birds are acoustically connected through skull spaces, often collectively termed the interaural canal. This internal coupling turns the ears into pressure-difference receivers, with sound reaching each eardrum from both sides. The driving force is then the instantaneous pressure difference across the eardrum, and the phase of eardrum movement is the difference between the phases of the direct and indirect component, weighted by the interaural transmission gain. Importantly, depending on the physical dimensions of the head, the sound wavelength and the attenuation across the interaural connections, increased directional cues to sound location may be generated, including enhanced ITDs (Christensen-Dalsgaard, 2011; Michelsen and Larsen, 2008).

<sup>1</sup>Department of Neuroscience, School of Medicine and Health Sciences, Carl von Ossietzky University Oldenburg, 26129 Oldenburg, Germany. <sup>2</sup>Cluster of Excellence ‘Hearing4all’ and Research Center Neurosensory Science, Carl von Ossietzky University Oldenburg, 26129 Oldenburg, Germany.

\*Author for correspondence (Christine.Koeppl@uol.de)

 C.K., 0000-0003-0729-709X

The presence of internal connections between the middle ears of birds (and, more generally, archosaurs) was demonstrated early and is undisputed (e.g. Owen, 1850; Schwartzkopff, 1952; Wada, 1924). However, the presence of internal coupling between the middle ears is merely a prerequisite for directionality and in itself does not prove that significant directional cues arise from it. It is the precise degree of interaural transmission that determines whether a significant directionality actually results. These details have proven difficult to define. The morphology of the connections across the head remains ill characterized, in large part due to the extensively pneumatized and trabeculated structure of avian bones, which generates a myriad of potential skull paths. Connections between the two sides probably include more than the classic ventral 'interaural canal' (Bierman et al., 2014; Christensen-Dalsgaard, 2011; Larsen et al., 2016; Rosowski, 1979). Attempts to quantify the physiological effect of internal coupling in birds include acoustic measurements at various locations both outside and inside the skull (Hill et al., 1980; Rosowski, 1979; Rosowski and Saunders, 1980), and measurements of eardrum vibration or recordings of cochlear microphonics as a proxy for eardrum vibration (Calford and Piddington, 1988; Hyson et al., 1994; Klump and Larsen, 1992; Larsen et al., 2006; Lewald, 1990; Moiseff, 1989; Rosowski, 1979). Conclusions about the significance of interaural connections have varied widely (reviewed by Christensen-Dalsgaard, 2005; Klump, 2000), no doubt further complicated by the discovery of a major source of experimental artefact, the buildup of negative middle-ear pressure under anesthesia (Larsen et al., 2016, 1997).

The present study aimed to re-investigate the effect of internally coupled ears in the chicken, with a specific emphasis on the ITD. The chicken is a well-studied animal model in the context of neural ITD coding. The possibility of internal coupling of the ears raises a serious problem for the controlled presentation of ITD, which is typically done via headphones when testing neural selectivity for ITD: in this situation, the acoustically presented ITD may not be the ITD heard by the bird, and this confounds the interpretation of neural responses. It is therefore important to quantify the effect of internal coupling of the ears for the species in question.

## MATERIALS AND METHODS

### Animal anesthesia and homeostasis

Experiments were carried out at the University of Sydney, NSW, Australia, and animal husbandry and experimental protocols were approved by the University of Sydney, NSW, Australia (Animal Ethics Committee approval no. K03/1-2007/3/4526). Cochlear microphonics were recorded in 8 chickens (*Gallus gallus domesticus*) of commercial egglayer breeds but of unknown sex, weighing between 100 and 200 g, on post-hatching day (P) 28–37. Their head widths, measured with calipers between the entrances to the ear canals, were 22–23 mm. Chickens were deprived of food for at least 2 h, in preparation for anesthesia, which was initiated by intramuscular injection of 20 mg kg<sup>-1</sup> ketamine hydrochloride and 3 mg kg<sup>-1</sup> xylazine. Supplementary doses were adjusted individually, at 50–100% of the initial dose, usually every 30–50 min. The primary monitor for depth of anesthesia was a combined electrocardiogram (ECG) and muscle-potential recording via insect needles inserted into the muscles of a leg and the contralateral wing. This signal was amplified (Grass P15) and constantly displayed on an oscilloscope. Cloacal temperature was held constant at 41.5°C via a feedback-controlled heating blanket (World Precision Instruments, Sarasota, FL, USA) wrapped around the chicken's body. The trachea was exposed in the neck region, cut

and intubated with a short piece of matching tubing to prevent problems from salivation; through this, chickens breathed normal room air unaided. The chicken's head was wrapped with strips of Plaster of Paris, which was connected to a metal head holder by dental cement, to fix the head in a defined position.

### Electrode placement and recordings

Bilateral surgical openings through the neck muscles and underlying bone provided access to the middle-ear spaces. Electrodes custom made of insulated silver wire with a small bare silver ball at the end were inserted and the silver ball placed onto the membrane covering the recessus scalae tympani. In a few cases, the membrane was slit and electrodes were inserted into scala tympani. This increased the recorded cochlear microphonics (CM) amplitude somewhat but did not provide sufficient advantage to adopt routinely. Electrodes were glued into place on the skull's surface with tissue glue and dental cement. Reference electrodes were placed under the skin nearby and were either silver ball electrodes of the same type, separate for left and right (four experiments), or an Ag/AgCl pellet shared for both channels (four experiments). The surgical holes, each of approximately 3–4 mm diameter, were left open during all measurements, thus ensuring middle-ear ventilation. Signals were amplified  $\times 500,000$  by a Tucker-Davis Technologies (TDT, Alachua, FL, USA) DB4 amplifier, bandpass filtered at 100 Hz to 15 kHz, and the two channels fed to the inputs of a TDT DD1 A/D converter that was connected to a TDT AP2 signal processing board. Data acquisition of the analog waveforms was controlled by custom-written software (XDPHYS, from the laboratory of M. Konishi, Caltech, USA).

### Sound stimulation

Sound stimulation was through custom-made closed sound systems placed at the entrance of both ear canals. They each contained a standard earphone (Sony MDR-E818LP) and calibrated miniature microphone (Knowles EM 3068). Microphone signals were amplified 40 dB by a custom-built amplifier. Sound-pressure levels (SPLs) and phases were calibrated individually at the start of each experiment and the calibrations used to adjust stimulus presentation online by custom-written software (XDPHYS). Near-constant sound pressures down to the lowest frequency of 100 Hz suggested closed-system conditions, although no sealing agents were applied. Sealing was probably achieved through the feathers surrounding the ear canals. Stimuli were generated separately for the two ears using a TDT AP2 signal processing board. Both channels were fed to the earphones via D/A converters (TDT DD1), anti-aliasing filters (TDT FT6-2) and attenuators (TDT PA4). Stimuli were tone bursts of 50 ms duration (including 5 ms linear ramps), presented at a rate of 5 s<sup>-1</sup>.

### Data collection and analysis

Monaural stimulation was usually tested at eight standard frequencies (100, 333, 571, 1000, 1515, 2000, 2500 and 3030 Hz), at 40–80 dB SPL, in 10 dB steps. Responses to 200 repetitions of each stimulus were recorded.

The same standard frequencies were also tested binaurally, usually at two levels (50 and 70 dB SPL). With binaural stimulation, ITD was also varied, within  $\pm 1$  stimulus period, in 10 steps per period. Repetitions were reduced from 200 to 50 for the higher level.

Recordings of the analog waveforms from the left and right ears were always obtained simultaneously, regardless of whether the stimulation was monaural or binaural. An averaged analog response waveform was derived for each stimulus condition and contained

both the compound action potential and the CM. Only the steady-state response between 15 and 45 ms re. stimulus onset was used for analysis, thus minimizing the neural component. A cosine function at the stimulus frequency was fitted and the amplitude and phase of this fit taken as the CM amplitude and phase. To eliminate recordings of insufficient signal-to-noise ratio, the fit amplitude was divided by (standard deviation of the averaged waveform  $\times \sqrt{2}$ ). The value of the resulting index is 1 if the waveform is identical to the fitted cosine and becomes zero if the waveform contains no stimulus frequency component (Köpl and Carr, 2008). Data were discarded if this index was below 0.5 for monaural recordings or if it remained below 0.5 for binaural recordings at all ITDs tested. If the CM amplitudes in binaural recordings showed an appreciable modulation with ITD, this ITD function was then fitted with a cosine function at the respective stimulus frequency (Viète et al., 1997) to determine peak ITD, defined as the peak closest to zero ITD.

### Blockage of interaural connections

In 3 chickens, an attempt was made to block interaural connections. The ear canal on one side was widened through a small skin cut to gain access to the eardrum. The eardrum was pierced with a syringe loaded with petroleum jelly, which was injected slowly behind the eardrum. The jelly appeared to liquefy quickly at the birds' normal body temperature. Injection was stopped when the jelly began to exude to the outside of the eardrum. The sound system was re-positioned, both sides were re-calibrated and selected measurements were repeated. In 2 of the 3 chickens, the skin cut was closed again with tissue glue in order to restore the ear canal as far as possible. As these manipulations potentially not only blocked the interaural connections but also damaged the middle and inner ear on the manipulated side, only recordings of the unmanipulated ear were subsequently used. At the conclusion of the experiments, the chickens were killed by an overdose of sodium pentobarbital and their heads were placed in a refrigerator overnight to solidify the

petroleum jelly. Care was taken to keep the head's spatial orientation unchanged. Placement of the petroleum jelly was visualized by dissection the next day.

## RESULTS

### Dependence of monaural CM measurements on sound level

CM recordings under monaural stimulation were obtained at several sound levels, generally between 40 and 80 dB SPL, in 10 dB steps. In the ipsilateral ear, CM amplitude was mostly above our criterion for signal-to-noise ratio at all these levels, i.e. the thresholds were 40 dB SPL or lower. Ipsilateral CM amplitude increased in a nearly linear fashion between 50 and 80 dB SPL at all frequencies (Fig. 1, top). In order to remain within this dynamic range in which CM amplitude was thus a reliable indicator of relative sound level, all comparisons between ipsilateral and contralateral CM readings reported below were made at 70 dB SPL stimulus level. CM amplitudes in the two ears of a given animal, and at a given sound level, were generally similar. However, if there was an asymmetry, for unknown reasons there was an overall bias for higher amplitude in the left ear. Comparisons between ipsilateral and contralateral CM readings were therefore consistently carried out between matched recordings of the same ear following stimulation from the ipsilateral and contralateral side, respectively (as opposed to simultaneous readings of the two CM recorded upon stimulation of a given ear; see Fig. 2A).

The phase of the CM was nearly invariant with level. Variations were not systematic and were typically less than 30 deg over a 30 dB range. Examples are shown in Fig. 1 (bottom).

### CM measurements of interaural transmission amplitude and delay

Interaural transmission was determined by comparing CM amplitudes from the same ear upon monaural stimulation with 70 dB SPL from the ipsilateral and contralateral side (see Fig. 2A).

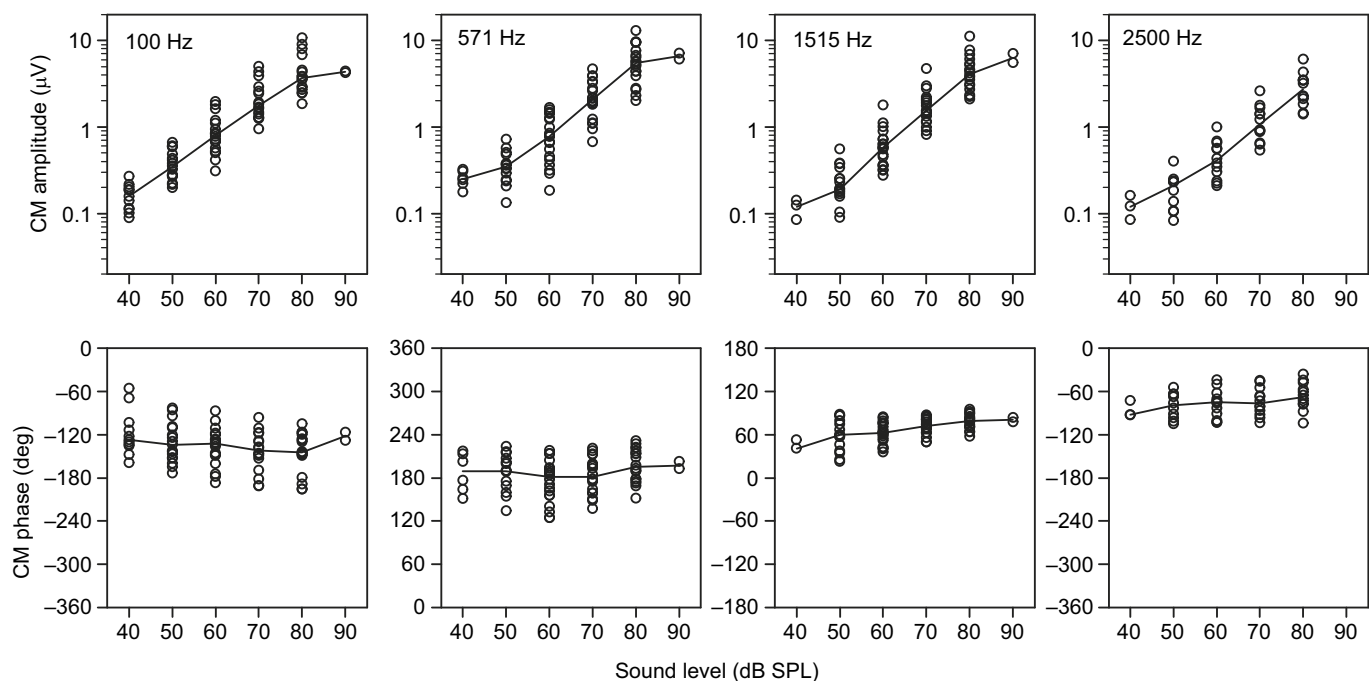

**Fig. 1. Cochlear microphonics (CM) behavior with monaural ipsilateral stimulation of increasing sound level, at four different frequencies.** Top: CM amplitude as a function of sound level (SPL, sound pressure level), at 100, 571, 1515 and 2500 Hz. Each panel shows raw data from both ears of 8 chickens; the solid line connects the median values at each level. Bottom: CM phase as a function of sound level at the four frequencies.

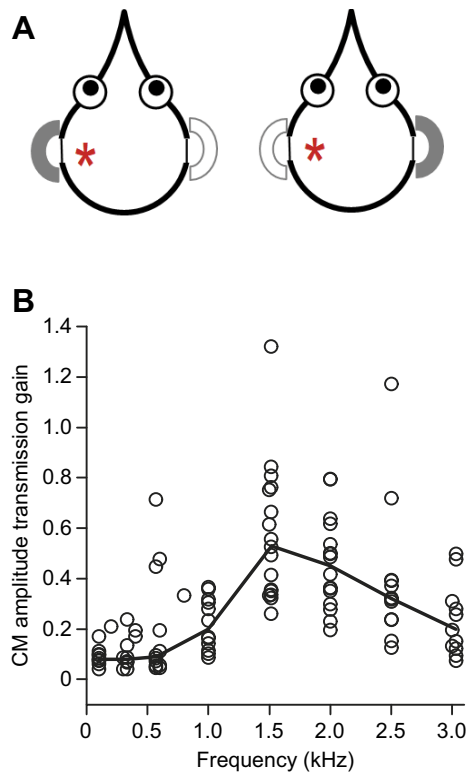

**Fig. 2. Interaural transmission gain.** (A) Cartoon illustration of same-ear comparison used to derive interaural transmission and delay. CM recordings from the same ear were compared (indicated by the red asterisk), in response to monaural stimulation of the ipsilateral or contralateral ear (indicated by the solid gray earphone). (B) Interaural transmission gain, i.e. the ratio of contralateral to ipsilateral CM amplitude, at 70 dB SPL. Shown are individual measurements from both ears of 8 chickens. The solid line connects the median values at each standard frequency. Note that additional data points at non-standard frequencies are included that were collected in early experiments.

Transmission was expressed as the ratio of contralateral to ipsilateral CM amplitude, comparable to the amplitude transmission gain derived from eardrum vibration measurements (Michelsen and Larsen, 2008). Amplitude transmission gain was maximal, at a median value of 0.53, at 1.5 kHz (Fig. 2B), corresponding to  $-5.5$  dB attenuation. Minimal transmission, with gain values below 0.1 (equivalent to  $>20$  dB attenuation), was observed at frequencies below 1 kHz.

Interaural delay was estimated in two different ways. First, a fixed delay should, with increasing frequency, result in a linearly rising phase accumulation in the contralateral CM. Indeed, the unwrapped plot of CM phase as a function of frequency was reasonably fitted by a linear regression with a slope corresponding to a time delay of  $264 \mu\text{s}$  (Fig. 3A). The phase of the ipsilateral CM varied randomly over frequency, indicating no or only very small (acoustic and transduction) delays. Second, to examine more closely for any frequency dependence, the phase difference between the paired, same-ear CM measurements upon ipsilateral and contralateral stimulation was determined and converted to the corresponding time delay. The phase of the contralateral CM was inverted by  $180^\circ$  before this comparison, to account for the fact that the same stimulus phase which causes inward motion of the ipsilateral eardrum will cause outward motion of the contralateral eardrum after traveling through the interaural connections, and will thus trigger an inverted CM response (Rosowski and Saunders, 1980;

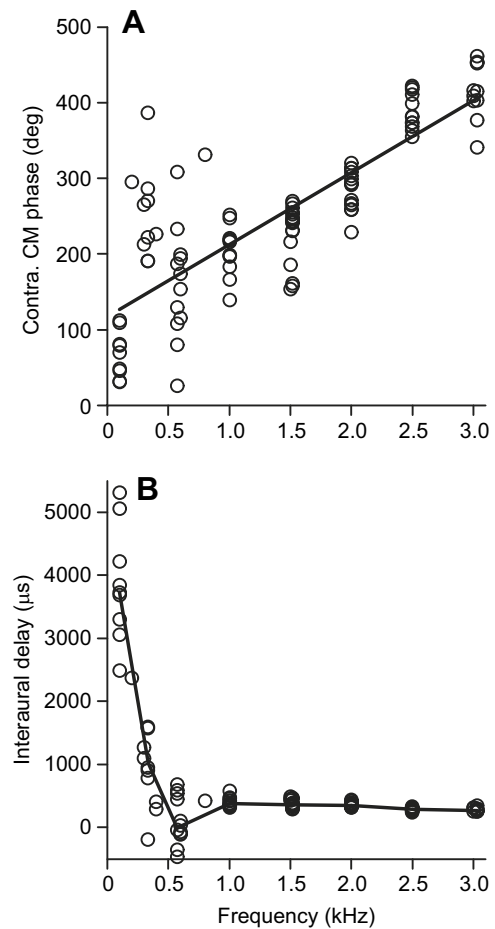

**Fig. 3. Measurement of interaural delay.** (A) Phase of the CM with contralateral stimulation at 70 dB SPL, unwrapped over different frequencies. Shown are raw data from both ears of 8 chickens. The solid line is a linear regression ( $y=117.16+0.095x$ ,  $r=0.82$ ,  $P<0.001$ ,  $n=99$ ), the slope of which corresponds to a constant delay of  $264 \mu\text{s}$ . (B) Interaural delay derived from same-ear comparisons, as illustrated in Fig. 2A. Phase differences were converted to time delays. The solid line joins median values at each standard frequency. Note that both panels include additional data points at non-standard frequencies that were collected in early experiments.

Larsen et al., 2006). With pure-tone stimulation, as used here, the phase comparison carries an inherent cyclic ambiguity. No assumptions were made about which side should be leading; thus, the reported phase differences are minimal values. As expected, these phase differences showed a similar frequency dependence to the contralateral CM phase readings alone. However, after converting to time differences, the deviations from linearity became apparent as a systematic decrease of interaural delay with increasing frequency. There was an initial drastic decrease from nearly  $4000 \mu\text{s}$  at  $100 \text{ Hz}$  to a median value of  $380 \mu\text{s}$  at  $1 \text{ kHz}$ , and a subsequent shallower decline to a median of  $264 \mu\text{s}$  at  $3 \text{ kHz}$  (Fig. 3B).

After blocking the interaural connections, the great majority of contralateral CM signals that had initially been above criterion disappeared into the noise (44 of 55, or 80%, over all frequencies and levels). The few that still met the criterion showed both significant reductions in amplitude and significant phase shifts, compared with the unblocked condition (Wilcoxon tests,  $P<0.01$ ,  $n=11$ ). Ipsilateral CM amplitude and phase were unaffected. After blockage, interaural attenuation was generally above  $30 \text{ dB}$  and independent of frequency. Careful dissection of the manipulated



heads after the experiment showed that the injected petroleum jelly had accumulated behind the eardrum and from there was primarily ventral. The connection that is commonly called the interaural canal (Larsen et al., 2016) had been filled to approximately the skull's midline.

#### Amplitude modulation of a CM with binaural stimulation of varying ITD

Upon binaural stimulation with equal sound levels, but varying ITD, CM amplitude of a given ear was clearly modulated with ITD (example in Fig. 4A). This is the equivalent of the directionality of eardrum vibration shown with free-field stimulation (reviewed in Christensen-Dalsgaard, 2011). Without any internal coupling, both CM amplitudes would be expected to remain unaffected by the varying ITD, as binaural sound levels were kept constant. If significant internal coupling exists, CM amplitudes would be expected to modulate in an ITD-dependent fashion, as eardrum vibration would modulate as a function of azimuthal sound-source position in the free field. The extent of this modulation was quantified as the ratio of maximal to minimal amplitude over a range of  $\pm 1$  period of ITD at the respective test frequency, and termed the ITD modulation ratio. This ITD modulation ratio was equal in the two ears (Wilcoxon test,  $P=0.372$ ,  $n=115$ ). However, it clearly varied with frequency. Maximal ITD modulation ratios occurred at 1.5 and 2 kHz, with median values of 2.22 and 1.99 (maximum 6.01). Ratios decreased towards both lower and higher frequencies (Fig. 4B), mirroring the frequency dependence of interaural transmission. Median modulation ratios were consistently higher at 50 dB SPL than at 70 dB SPL. However, this difference was only significant for low frequencies. At 1 kHz and above, modulation ratios did not differ significantly with sound level (Fig. 4B; Mann–Whitney  $U$ -tests,  $P$ -value below or above 0.05, respectively).

Importantly, the modulation of CM amplitude with ITD was consistently abolished upon blockage of the interaural connections (Fig. 4A,C). Because our method of blockage from one side also impaired the ear ipsilateral to the manipulation, only the remaining good, contralateral ear could be evaluated. ITD modulation ratios in the remaining good ear never exceeded 1.09 at all frequencies (median values 1.01–1.04; Fig. 4C).

On average, the CM showed consistently higher maximal amplitudes and lower minimal amplitudes in the binaural condition, compared with monaural stimulation at the same sound levels. This suggests both constructive and destructive phase interference with binaural input. However, a frequency dependence was also obvious. CM maximal amplitude at frequencies between 1 and 2.5 kHz in response to binaural stimulation at 70 dB SPL was reliably reduced after blockage of the interaural connections (same individual ears compared; only unmanipulated side; example in Fig. 4A). In contrast, the amplitude change was more variable for lower frequencies and at 3030 Hz, with 2 out of 3 ears actually showing enhanced amplitude after blockage of the interaural connections, suggesting a predominantly destructive interaction in the normal binaural condition at those frequencies.

#### Comparison of ITD presented versus ITD heard

Next, I used the phases of simultaneously recorded left and right CMs under binaural stimulation to derive the actual ITD that the animal experienced, the 'ITD heard'. This is the same basic comparison as that performed by neurons in the binaural nucleus laminaris (e.g. Ashida and Carr, 2011). Phase differences were disambiguated and unwrapped, assuming that the difference that

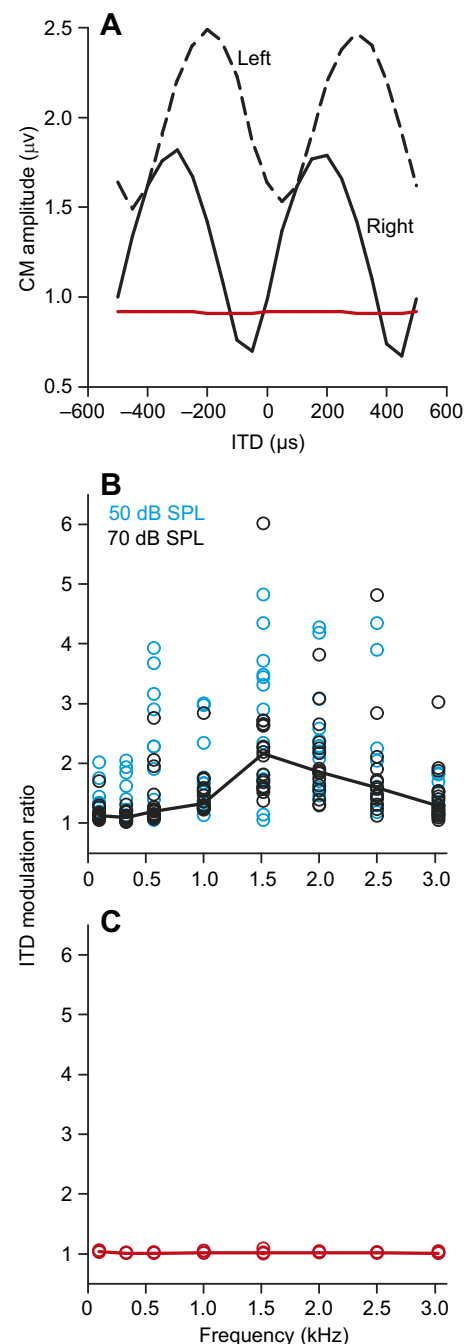

**Fig. 4. Modulation of CM amplitude upon binaural stimulation with varying interaural time delay (ITD).** (A) Example of simultaneous CM recordings in both ears of an individual chicken, stimulated at 2 kHz and 70 dB SPL. Both CM recordings were clearly modulated in amplitude as a function of ITD; modulation ratios were 1.63 (left) and 2.35 (right). Note the complete absence of modulation after blockage of the interaural connections (data shown in red, right ear; modulation ratio 1.02). (B) ITD modulation ratios for all measurements in all ears (8 chickens), at two different sound levels: 50 and 70 dB SPL. The solid line connects the median values for 70 dB SPL at each standard frequency. (C) ITD modulation ratios at 70 dB SPL, after blockage of the interaural connections in 3 chickens.

corresponded most closely to the acoustically presented ITD was the correct one (examples in Fig. 5A,E). In other words, we assumed that the actual phase difference could not differ from the presented one by more than 180 deg.

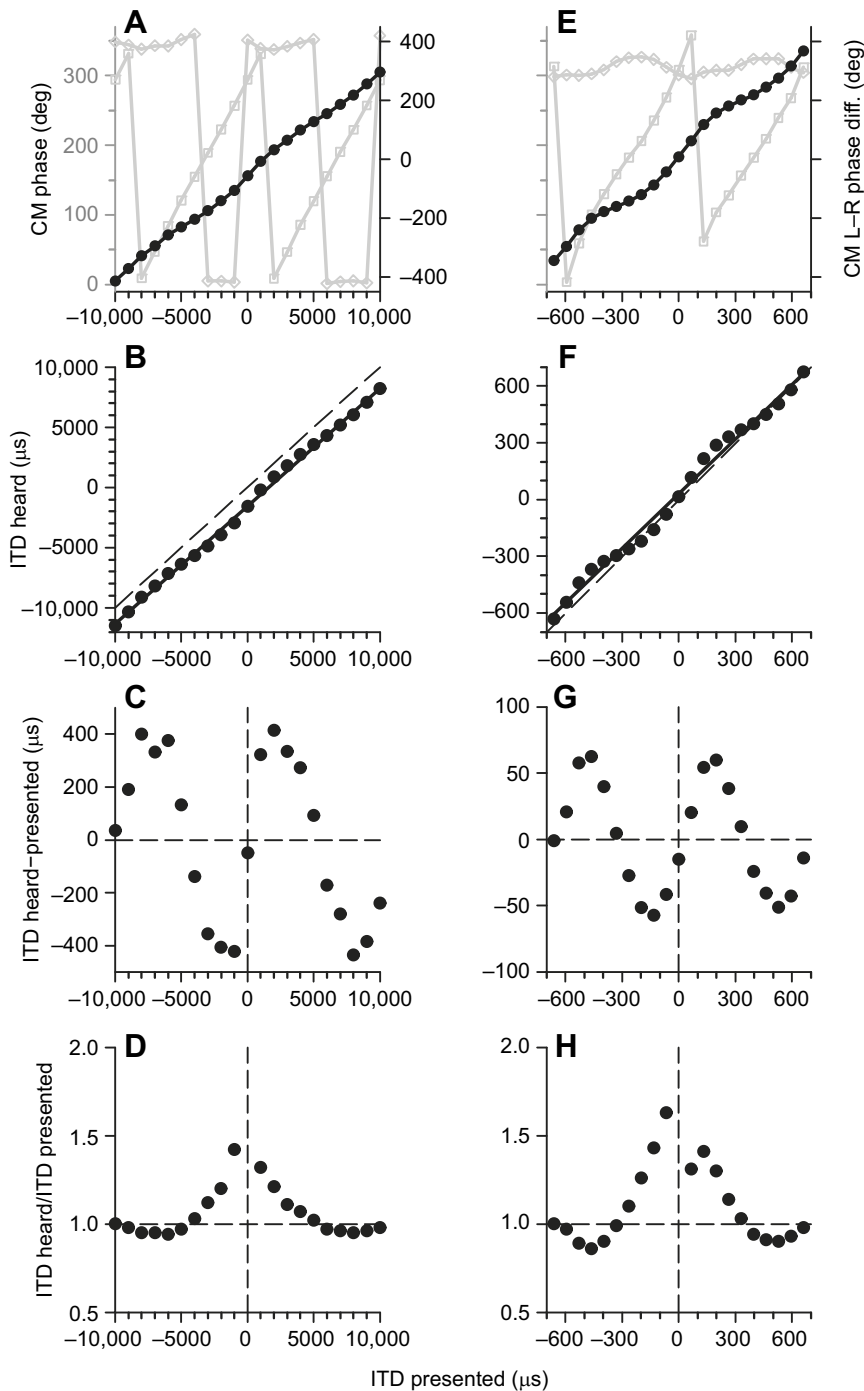

**Fig. 5. Two examples of the derivation of 'ITD heard'.** (A–D) An example with binaural stimulation at 100 Hz, 70 dB SPL. (E–H) An example with binaural stimulation at 1515 Hz, 50 dB SPL. (A,E) Raw phases of the simultaneously recorded left and right CMs (gray symbols and lines, left ordinate), as a function of the acoustically presented ITD, varied over  $\pm 1$  period of the stimulation frequency. Also shown is the difference between the unwrapped left and right CM phases (black symbols and lines, right ordinate). (B,F) Phase differences converted to time difference, termed the ITD heard, as a function of the acoustically presented ITD. The solid lines are linear regressions to the data points; the dashed lines indicate identical values for presented and heard ITD, for reference. Note that the data show both a constant offset and an ITD-varying deviation from this reference. The constant offset is represented by the y-axis intercept of the linear regression. (C,G) For these data, the constant offset has been subtracted, and the remaining deviation of the ITD heard from the ITD acoustically presented is shown as a function of the acoustically presented ITD. Note that the largest deviations occurred near the acoustic midline. (D,H) The ratio of ITD heard/ITD presented acoustically, for the same data.

The ITD heard commonly deviated systematically from the acoustically presented ITD. Many recordings showed two components to this: a constant offset from the expected (acoustically presented) ITD and an ITD-dependent deviation cycling at the period of the stimulation frequency. The constant offset was quantified as the y-axis intercept of the linear regression of ITD heard as a function of ITD presented (examples in Fig. 5B, F). The offset appeared to vary randomly within mostly  $\pm 50$  deg (0.15 cycles), independent of frequency or sound level. However, there was a tendency for this offset to show a consistent polarity in a given animal. We therefore assumed it to be an artefact of slightly asymmetric recording conditions between the two ears, although the polarity of the offset was unrelated to asymmetries in the CM

amplitudes of the two sides. The offset was subtracted from all measurements and the unbiased difference between the ITD heard and the ITD presented was derived (examples in Fig. 5C, G). To highlight whether this deviation would have enhanced or reduced the perceived ITD relative to the acoustically presented ITD, the ratio between them was also determined (Fig. 5D, H). Note that ratios above 1 indicate a larger ITD heard, and ratios below 1 indicate a smaller ITD heard.

For both examples shown in Fig. 5, the largest ratios occurred around zero ITD, suggesting that the deviations would act to enhance ITDs in the chicken's natural range. This was also typical at the population level. Fig. 6 shows median data for four frequencies, at both sound levels tested (50 and 70 dB SPL). Median ratios were

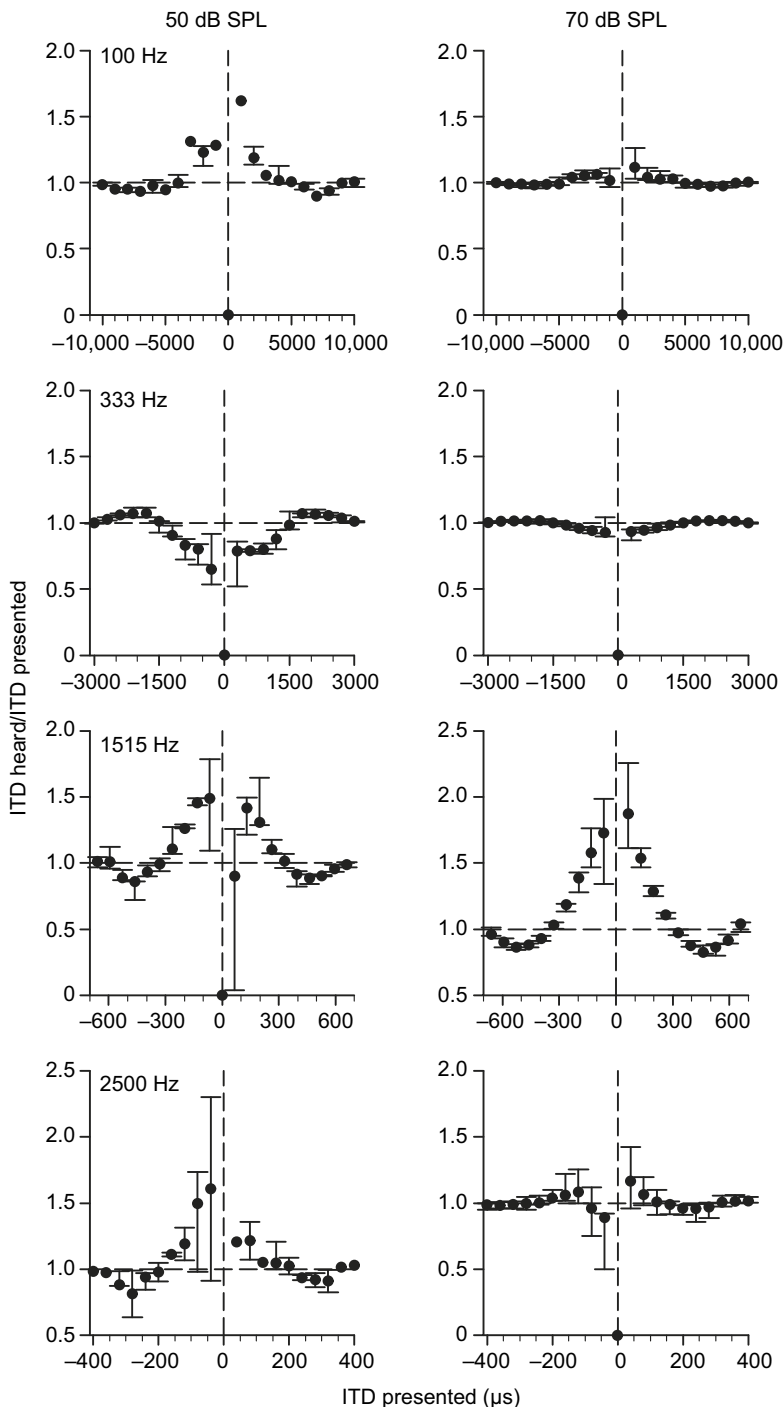

**Fig. 6. Median ratios of ITD heard/ITD presented acoustically.** Data for four different frequencies are shown (from top to bottom): 100, 333, 1515 and 2500 Hz. The two columns of panels show data for two different sound levels: 50 and 70 dB SPL. Medians and interquartile ranges are plotted as a function of the acoustically presented ITD. Vertical dashed lines indicate the acoustic midline, i.e. zero ITD, and horizontal dashed lines indicate identical values for ITD heard and ITD presented, i.e. a ratio of 1, for reference. Ratios above 1 indicate a larger ITD heard and ratios below 1 indicate a smaller ITD heard. Note that this kind of plot highlights whether a deviation would increase the perceived ITD range (ratios >1) or compress it (ratios <1). At 100, 1515 and 2500 Hz, the effect was an enhancing one. However, at 333 Hz, the effect was compressive. Note also that at most frequencies, ratios were greater at the lower sound level of 50 dB SPL.

generally positive around the acoustic midline, with the exception of 333 Hz (Fig. 6), where the ratios were negative, suggesting an unfavorable compression of the ITD range heard. A further, unexpected observation was that the extent of enhancement (or compression, at 333 Hz) could be level dependent. Ratios were often, but not universally, higher at 50 dB SPL than at 70 dB SPL (Fig. 6). The highest median ratio, 1.86 at 1515 Hz and 70 dB SPL, suggested an enlargement of the ITD heard by a factor of 1.8, compared with the acoustically presented ITD.

Finally, a prediction was derived from these data about the ITDs that the chicken should hear when a sound source originates in the free field from 90 deg to one side. For this, a value for the maximal acoustic ITD between the chicken's ear canals needed to be chosen.

According to the spherical head model of Kuhn (1977), an acoustic ITD of 100  $\mu$ s should occur for chickens with a head width of 23 mm (as used here), or 130  $\mu$ s for adult chickens with 30 mm head width. Acoustic ITD actually measured was around 170  $\mu$ s for adult chickens (Schnyder et al., 2014; estimated from phase measurements shown in their fig. S9). As a best educated guess, we then calculated ITDs heard for 130  $\mu$ s acoustically presented ITD. The prediction was derived by linear interpolation between adjacent data points, averaging ipsilateral and contralateral leading ITDs (i.e. assuming symmetry), and finally averaging the predictions derived from measurements at 50 and 70 dB SPL. Fig. 7 shows the result together with previously published data (see Discussion).

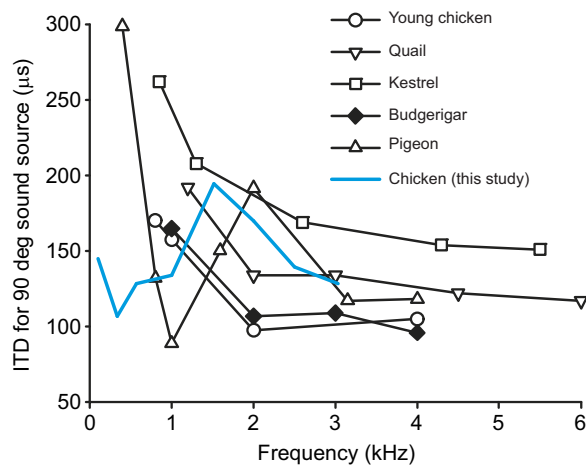

**Fig. 7. ITD heard from a sound source 90 deg to one side of an animal in the free field, as a function of frequency.** Data shown in black are from published sources, distinguished by different symbols: quail (head width 24 mm; Calford and Piddington, 1988), nankeen kestrel (31 mm; Calford and Piddington, 1988), young chicken (17 mm; Hyson et al., 1994), pigeon (22 mm according to Lewald, 1990; data shown are from Rosowski, 1979) and budgerigar (16 mm; Larsen et al., 2006). The blue line is a prediction from the present data, obtained with closed-system stimulation, assuming a uniform acoustic ITD of 130  $\mu$ s between the two ear canals. Any deviation from a flat line in such a plot suggests significant internal coupling of the middle ears. Note the very similar trends of all datasets at frequencies above 1.5 kHz, but the much larger variation at lower frequencies, most prominently the markedly reduced ITD enhancement with closed-system stimulation in the present study.

## DISCUSSION

The present study obtained clear evidence for a significant modulation of the sound localization cue ITD experienced by the chicken, relative to that presented acoustically to each ear. This modulation was shown to be mediated by the physical coupling between the middle ears, because blocking the interaural connection abolished the modulation. Data from zebra finch, pigeon and alligator suggest the presence of several distinct connective pathways across the head, including the most easily identified, ventrally directed interaural canal (Biernan et al., 2014; Larsen et al., 2016; Rosowski, 1979). The blocking experiments reported here are consistent with the existence of additional pathways in the chicken, too. Visual inspection suggested that the block typically filled the space immediately behind the eardrum and the ventral interaural canal, on the injected side. Although this largely eliminated all ipsilateral CM responses and bilateral CM recordings were no longer possible after the block, acoustic measurements by microphones in the ear canals indicated some remaining crosstalk (data not shown).

It has previously been suggested that ITD is significantly modulated by internally coupled middle ears, both in chickens (Hyson et al., 1994) and in other avian species (Calford and Piddington, 1988; Larsen et al., 2006; Rosowski, 1979). Other investigators, however, remained unconvinced of any significant physiological coupling (Klump and Larsen, 1992; Lewald, 1990). The specific value added by the present study is severalfold: (1) The chicken is a popular model species in auditory localization research. These are the first measurements of interaural transmission and delay in chickens that consciously avoided the confounding artefact of negative pressure buildup in the middle ear under anesthesia. (2) By using CM, most of the frequency range that is relevant to the chicken and many other birds could be probed, including low frequencies down to 100 Hz. (3) ITD was determined in the same individuals. By stimulating through closed sound systems, a

situation typically used in neurophysiological tests for ITD selectivity was replicated.

## Validity of CM measurements as a proxy for eardrum vibration

Different methods have been employed to experimentally verify the effect of internally coupled ears. Arguably, the most elegant and direct way is to measure eardrum vibration in the intact animal, using laser Doppler vibrometry (reviewed in Michelsen and Larsen, 2008) which, ideally, avoids any kind of invasive manipulation. However, an important limitation is the often inadequate signal-to-noise ratio at low frequencies, below 1–2 kHz. This excludes a substantial part of the frequency range of interest in the debate about ITD cues and their neural coding. Furthermore, aiming a laser beam onto the eardrum is, in practice, difficult to combine with the use of closed sound systems. Measurements of CM, in contrast, while not suffering the above restrictions, are only an indirect correlate of eardrum motion. Although it is undisputed that hair-cell responses are the principal source of the CM, the source distribution within the cochlea upon stimulation with different frequencies is not well characterized in birds (Köppl and Gleich, 2007).

An important prerequisite to using the CM as a proxy for eardrum vibration is that it behaves linearly within the SPL range of measurements. This was satisfied here. CM amplitude grew linearly with sound level up to 80 dB SPL (Fig. 1, top). Important for phase comparisons, the phase of the CM was, on average, invariant with sound level (Fig. 1, bottom), consistent with the findings of Calford and Piddington (1988) in quails. Small non-linearities are difficult to exclude and are the likely cause of the minor level dependencies observed in binaural data (Fig. 6). One likely source of non-linearity is a different (larger) set of hair-cell generators at higher sound levels. Another possibility is efferent feedback to the hair cells which could conceivably occur within the analysis window used here (Kaiser and Manley, 1994). In contrast, the middle-ear reflex is only triggered during vocalization in chickens (Counter and Borg, 1979; Larsen et al., 1997) and was thus not likely in the present experiments.

## Comparison with previous estimates of interaural transmission and delay in birds

Previous studies in different bird species did not universally agree on the principal existence of significant internal coupling between the middle-ear spaces. A large part of the variation between studies is probably due to two experimental artefacts that reduce interaural transmission in a frequency-specific manner, as compared with the natural situation of an awake bird in the acoustic free field. One of these detrimental conditions is the potential buildup of negative middle-ear pressure in anesthetized birds (Larsen et al., 2016, 1997). The occurrence and extent of this artefact are highly variable and species specific and may thus have led to decreased estimates of interaural coupling in earlier studies (lack of awareness of the problem) to unknown degrees. Indeed, interaural transmission values obtained in awake birds or under anesthesia but with middle-ear ventilation ensured tend to be the highest reported: around a maximal gain of 0.55 or –5 dB attenuation (Larsen et al., 1997) and 0.3 or –10 dB (Larsen et al., 2006) for anesthetized and awake budgerigars, respectively, 0.5 or –6 dB in the anesthetized barn owl (Kettler et al., 2016), and 0.53 or –5.5 dB in the present study for anesthetized chickens.

Furthermore, there is evidence that sealing closed sound-delivery systems to the ear canal(s) also acts to reduce interaural transmission, and also disproportionately at lower frequencies.



Although this is difficult to disentangle from the middle-ear pressure artefact in older work, the present study adds considerable strength to that hypothesis. Using closed sound systems sealed to both ear canals, two previous studies, in chicken (Rosowski and Saunders, 1980) and pigeon (Rosowski, 1979), as well as the present study observed relatively less interaural transmission at low frequencies. In the starling, interaural transmission was flat up to 3.5 kHz, with only one ear canal sealed to a closed sound delivery system (Klump and Larsen, 1992). In contrast, with open-field stimulation, interaural transmission in the budgerigar was most effective at about 1 kHz, compared with frequencies above that (Larsen et al., 2006, 1997). In dead quail (where the above anesthesia artefact should not have occurred), a direct comparison of free-field and closed-field stimulation showed the same relative reduction of transmission at low frequencies, with one ear canal sealed to a closed sound delivery system (Hill et al., 1980). Such changes under headphone conditions may be due to restricting the air volume coupled to the external auditory meatus and thus changing middle-ear stiffness, similar to what has been shown in frogs (Gridi-Papp et al., 2008; Pinder and Palmer, 1983).

Measurements of interaural delay across the head, i.e. the transmission time for sound between an ipsilateral source and the inside of the contralateral eardrum, typically show values that are clearly larger than the acoustic travel time across the linear head width. In chickens, budgerigars, starlings and barn owls, phase measurements of eardrum vibration or CM yielded estimated interaural delays of 70–232  $\mu$ s, which correspond to 2–4 times the equivalent interaural distances of those birds (Kettler et al., 2016; Larsen et al., 2006; Rosowski and Saunders, 1980). The present mean value of 264  $\mu$ s interaural delay for the chicken also falls within this range, and corresponds to nearly 4 times the equivalent head width of the chickens used. Perhaps most strikingly, the interaural delay in the chicken was frequency dependent, with values increasing into the millisecond range at the lowest frequencies evaluated here. Two previous studies, also using closed-system stimulation, extended to similarly low frequencies. In pigeon CM and acoustic measurements, Rosowski (1979) found a very similar frequency dependence (converting his phase values to time), with maximal delays of about 600  $\mu$ s at 160–200 Hz, and around 120  $\mu$ s above 1 kHz. Acoustic measurements in chickens, however, with the identical technique, found no interaural delay at all for frequencies up to 1 kHz (Rosowski and Saunders, 1980). Clearly, these datasets cannot be reconciled and currently remain unexplained. Evidence that multiple sound paths across the avian skull exist has recently led to speculations about how these different paths might interact and create frequency-dependent phase shifts (Larsen et al., 2016). Furthermore, a variable that remains unexplored is the influence of the size and location of surgical skull openings, such as those in the present experiments or during brainstem neurophysiology.

In summary, interaural transmission and interaural delay are salient parameters that determine what exactly arrives at the contralateral eardrum after traversing the head. All the available data agree that sound does not simply travel unimpeded across the avian head but is attenuated and significantly delayed. The degree of interaural transmission has been underestimated so far in birds and probably typically peaks for low frequencies around a gain of 0.5, or –6 dB attenuation. Although this gain is not as high as in lizards, which hold the record of nearly unimpeded interaural transmission (Christensen-Dalsgaard and Manley, 2008), it is of the same order as in frogs and insects (Christensen-Dalsgaard, 2011; Michelsen and Larsen, 2008) and should put to rest any remaining doubts about the significance of internal coupling between avian middle ears.

However, it is important to emphasize that under the conditions used here and typically in neurophysiological experiments, i.e. with closed-field stimulation and surgical skull openings present, interaural transmission at low frequencies is probably compromised. The interaural delay is typically several times longer than expected from simply traversing the head width, consistent with anatomical evidence for complex sound paths through the avian skull. Any frequency dependence of the interaural delay and possible artefactual alterations remain ill characterized and this in particular still makes it difficult to predict the ITD resulting from internal coupling of avian middle ears.

### Extent of binaural ITD enhancement

The present data showed significant internal coupling between the chicken's middle ears. Furthermore, our measurements clearly suggested an expansion of the ITD range heard, compared with what was acoustically presented with binaural stimulation, at some of the frequencies evaluated. However, data obtained under closed-system headphone stimulation do not directly translate to free-field conditions. As discussed above, interaural transmission is probably compromised with closed-field stimulation at low frequencies, thus underestimating the potential enhancing effects on ITD. In contrast, when changing the position of a sound source under free-field conditions, ILDs occur in addition to ITDs, while in our headphone experiments, ITDs were presented in isolation. This will tend to maximize interaural effects, as the sound of a simulated contralateral source is then only attenuated by the interaural connections and not, in addition, by head and body shadowing. However, compared with interaural attenuation, attenuation by diffraction is a minor component at frequencies up to about 4 kHz (Larsen et al., 2006).

Fig. 7 validates these assumptions. Here, the prediction from our data, of ITD heard from sound sources originating 90 deg to one side, is shown together with published ITDs derived from CM or eardrum vibration recordings under free-field conditions, for sound sources 90 deg to one side, in birds with approximately similar head sizes: quail (head width 24 mm; Calford and Piddington, 1988), nankeen kestrel (31 mm; Calford and Piddington, 1988), young chicken (17 mm; Hyson et al., 1994), budgerigar (16 mm; Larsen et al., 2006) and pigeon (22 mm; Rosowski, 1979). As expected, the data obtained under free-field conditions mostly show larger ITDs at low frequencies, below 1 kHz. At higher frequencies, however, our data are a good match. The comparison supports the notion that: (1) under natural free-field conditions, ITDs are enhanced by the internally coupled middle ears, (2) ITDs increase with decreasing frequency, and (3) ITDs reach at least 200  $\mu$ s in a bird of adult quail or chicken size. The low-frequency range, below 1 kHz, still shows the largest uncertainties. Currently, it can only be assumed that the ITD heard continues to rise with decreasing frequency, but the precise value of the increase remains unknown. Eardrum vibration data do not extend to such low frequencies, as the velocity measurements typically used are insufficiently sensitive. In addition, the well-defined free-field presentation of such low frequencies requires large anechoic chambers, which may explain why most of the classic CM measurements using free-field stimulation also did not probe such low frequencies. The present study demonstrated that the use of headphone stimulation is also not an alternative, because this in itself alters the properties of the internal coupling.

### Implications for the interpretation of neural recordings

One main motivation for the present study was to clarify the influence of the internally coupled middle ears of chickens under the standard

experimental conditions used during neurophysiological recordings from neurons involved in ITD processing. In such experiments, acoustic stimulation through closed sound systems sealed to both ear canals is the norm because: (1) it enables controlled, separate stimulation of the two ears, allowing variation only in ITD, for example, in order to probe the specific selectivity of neurons; and (2) a well-defined acoustic free field is difficult to achieve because of the extensive equipment necessary for invasive neurophysiology and typically surrounding the experimental animal (Michelsen and Larsen, 2008). In addition, surgical openings of the skull are unavoidable. Considering the extensive nature of interaural connections that has been suggested in an avian head (Rosowski, 1979; Larsen et al., 2016), any skull opening might potentially affect the interaural connections and thus alter their properties. This experimental variable has not been explored beyond the demonstration of the ventilation effect by Larsen et al. (1997, 2016). Therefore, in invasive neurophysiology, potential additional artefacts due to skull openings are currently inseparable from the demonstrated artefacts of closed-field acoustic stimulation already discussed.

An important lesson from the present study for the interpretation of neurophysiological data is that the ITD that is acoustically played by the headphones is not necessarily what is relayed by the two inner ears and subsequently compared by the binaural brainstem neurons. In other words, neurophysiological responses are referred to the wrong ITD in such cases. Furthermore, for tonotopically organized nuclei in which the individual neurons are also narrowly frequency tuned, the errors introduced may differ between frequency ranges. The present data suggest that, in the chicken, the ITD range responded to by neurons with best frequencies between approximately 1.5 and 2.5 kHz will be artificially compressed, because the ITD heard is significantly larger than that acoustically presented. Conversely, responses of neurons around 300 Hz will show artificially inflated ITD ranges, because here, the ITD heard under headphone conditions is actually smaller than that acoustically presented. Also, subtle deviations from the standard cosine shape of ITD selectivity are expected because of the non-linear variation in ITD heard with ITD presented. Indeed, such deviations can be seen in published responses from single units in the chicken's nucleus laminaris and have previously gone unnoticed (e.g. fig. 1 in Palanca-Castan and Köppl, 2015).

One might argue that the errors introduced in that way are small and will not affect principal findings. However, the debate about what constitutes a physiologically meaningful ITD response in binaural neurons has a particular and controversial history (e.g. Joris and Yin, 2007; McAlpine, 2005). Some of it was based on incorrect (too low) assumptions about the naturally heard ITD range of animals, for both mammals and birds (see Introduction). The present study has identified an additional confounding factor in animals with internally coupled middle ears, i.e. non-mammalian species. Unfortunately, the present results cannot be assumed to generalize quantitatively to other species, i.e. the specific artefacts introduced by headphone stimulation and other experimental manipulations need to be identified in each case.

#### Acknowledgements

I thank Mark Konishi for the generous gift of the XDPHYS software, which was custom-written in his lab and used in these experiments, and STELS-OL (Scientific and Technical English Language Services, Oldenburg, Germany) for English language editing of the manuscript.

#### Competing interests

The author declares no competing or financial interests.

#### Funding

This work was supported by the Australian Research Council (ARC, grant DP0984692) and a University of Sydney R&D grant.

#### Data availability

The original data and compilations of analyses used here are available from the Dryad digital repository (Koepl, 2019): [dryad.q30s950](https://doi.org/10.5061/dryad.q30s950)

#### References

- Ashida, G. and Carr, C. E. (2011). Sound localization: jeffress and beyond. *Curr. Opin. Neurobiol.* **21**, 745–751. doi:10.1016/j.conb.2011.05.008
- Bierman, H. S., Thornton, J. L., Jones, H. G., Koka, K., Young, B. A., Brandt, C., Christensen-Dalsgaard, J., Carr, C. E. and Tollin, D. J. (2014). Biophysics of directional hearing in the American alligator (*Alligator mississippiensis*). *J. Exp. Biol.* **217**, 1094–1107. doi:10.1242/jeb.092866
- Brown, C. H. and May, B. J. (2005). Comparative mammalian sound localization. In *Sound Source Localization*, Vol. 25 (ed. A. N. Popper and R. R. Fay), pp. 124–178. New York: Springer Science and Business Media, Inc.
- Calford, M. B. and Piddington, R. W. (1988). Avian interaural canal enhances interaural delay. *J. Comp. Physiol. A* **162**, 503–510. doi:10.1007/BF00612515
- Carr, C. E. and Christensen-Dalsgaard, J. (2015). Sound localization strategies in three predators. *Brain Behav. Evol.* **86**, 17–27. doi:10.1159/000435946
- Carr, C. E. and Christensen-Dalsgaard, J. (2016). Evolutionary trends in directional hearing. *Curr. Opin. Neurobiol.* **40**, 111–117. doi:10.1016/j.conb.2016.07.001
- Christensen-Dalsgaard, J. (2005). Directional hearing in nonmammalian tetrapods. In *Sound Source Localization* (ed. A. N. Popper and R. R. Fay), pp. 67–123. New York: Springer Science and Business Media, Inc.
- Christensen-Dalsgaard, J. (2011). Vertebrate pressure-gradient receivers. *Hear. Res.* **273**, 37–45. doi:10.1016/j.heares.2010.08.007
- Christensen-Dalsgaard, J. and Manley, G. A. (2008). Acoustical coupling of lizard eardrums. *J. Assoc. Res. Otolaryngol.* **9**, 407–416. doi:10.1007/s10162-008-0130-2
- Counter, S. A. and Borg, E. (1979). Physiological activation of the stapedius muscle in *Gallus gallus*. *Acta Otolaryngologica (Stockholm)* **403**, 13–19. doi:10.3109/00016487909137134
- Gridi-Papp, M., Feng, A. S., Shen, J.-X., Yu, Z.-L., Rosowski, J. J. and Narins, P. M. (2008). Active control of ultrasonic hearing in frogs. *Proc. Natl. Acad. Sci. USA* **105**, 11014–11019. doi:10.1073/pnas.0802210105
- Grothe, B. and Pecka, M. (2014). The natural history of sound localization in mammals—a story of neuronal inhibition. *Front. Neural Circuits* **8**, 116. doi:10.3389/fncir.2014.00116
- Grothe, B., Pecka, M. and McAlpine, D. (2010). Mechanisms of sound localization in mammals. *Physiol. Rev.* **90**, 983–1012. doi:10.1152/physrev.00026.2009
- Hartmann, W. M. (1999). How we localise sound. *Phys. Today* **52**, 24–29. doi:10.1063/1.882727
- Hausmann, L., von Campenhausen, M. and Wagner, H. (2010). Properties of low-frequency head-related transfer functions in the barn owl (*Tyto alba*). *J. Comp. Physiol. A* **196**, 601–612. doi:10.1007/s00359-010-0546-0
- Hill, K. G., Lewis, D. B., Hutchings, M. E. and Coles, R. B. (1980). Directional hearing in the Japanese quail (*Coturnix coturnix japonica*). I. Acoustic properties of the auditory system. *J. Exp. Biol.* **86**, 135–151.
- Hyson, R. L., Overholt, E. M. and Lippe, W. R. (1994). Cochlear microphonic measurements of interaural time differences in the chick. *Hear. Res.* **81**, 109–118. doi:10.1016/0378-5955(94)90158-9
- Jones, H. G., Koka, K., Thornton, J. L. and Tollin, D. J. (2011). Concurrent development of the head and pinnae and the acoustical cues to sound location in a precocious species, the chinchilla (*Chinchilla lanigera*). *J. Assoc. Res. Otolaryngol.* **12**, 127–140. doi:10.1007/s10162-010-0242-3
- Joris, P. X. and Yin, T. C. T. (2007). A matter of time: internal delays in binaural processing. *Trends Neurosci.* **30**, 70–78. doi:10.1016/j.tins.2006.12.004
- Kaiser, A. and Manley, G. A. (1994). Physiology of single putative cochlear efferents in the chicken. *J. Neurophysiol.* **72**, 2966–2979. doi:10.1152/jn.1994.72.6.2966
- Kettler, L., Christensen-Dalsgaard, J., Larsen, O. N. and Wagner, H. (2016). Low frequency eardrum directionality in the barn owl induced by sound transmission through the interaural canal. *Biol. Cybern.* **110**, 333–343. doi:10.1007/s00422-016-0689-3
- Klump, G. M. (2000). Sound localization in birds. In *Comparative Hearing: Birds and Reptiles*, Springer Handbook of Auditory Research, Vol. 13 (ed. R. J. Dooling, R. R. Fay and A. N. Popper), pp. 249–307. New York: Springer Verlag.
- Klump, G. M. and Larsen, O. N. (1992). Azimuthal sound localization in the European starling (*Sturnus vulgaris*): I. Physical binaural cues. *J. Comp. Physiol. A* **170**, 243–251. doi:10.1007/BF00196906
- Köppl, C. (2009). Evolution of sound localisation in land vertebrates. *Curr. Biol.* **19**, R635–R639. doi:10.1016/j.cub.2009.05.035
- Koepl, C. (2019). Data from: Internally coupled middle ears enhance the range of interaural time differences heard by the chicken. *Dryad Digital Repository*. <https://doi.org/10.5061/dryad.q30s950>

- Köppl, C. and Carr, C. E.** (2008). Maps of interaural time difference in the chicken's brainstem nucleus laminaris. *Biol. Cybern.* **98**, 541-559. doi:10.1007/s00422-008-0220-6
- Köppl, C. and Gleich, O.** (2007). Evoked cochlear potentials in the barn owl. *J. Comp. Physiol. A* **193**, 601-612. doi:10.1007/s00359-007-0215-0
- Kuhn, G. F.** (1977). Model for the interaural time differences in the azimuthal plane. *J. Acoust. Soc. Am.* **62**, 157-167. doi:10.1121/1.381498
- Larsen, O. N., Dooling, R. J. and Ryals, B. M.** (1997). Roles of intracranial air pressure in bird audition. In *Diversity in Auditory Mechanics* (ed. E. R. Lewis, G. R. Long, R. F. Lyon, P. M. Narins, C. R. Steele and E. Hecht-Poinar), pp. 11-17. Singapore: World Scientific Publishing.
- Larsen, O. N., Dooling, R. J. and Michelsen, A.** (2006). The role of pressure difference reception in the directional hearing of budgerigars (*Melopsittacus undulatus*). *J. Comp. Physiol. A* **192**, 1063-1072. doi:10.1007/s00359-006-0138-1
- Larsen, O. N., Christensen-Dalsgaard, J. and Jensen, K. K.** (2016). Role of intracranial cavities in avian directional hearing. *Biol. Cybern.* **110**, 319-331. doi:10.1007/s00422-016-0688-4
- Lewald, J.** (1990). The directionality of the ear of the pigeon (*Columba livia*). *J. Comp. Physiol. A* **167**, 533-543. doi:10.1007/BF00190824
- Maki, K. and Furukawa, S.** (2005). Acoustical cues for sound localization by the Mongolian gerbil, *Meriones unguiculatus*. *J. Acoust. Soc. Am.* **118**, 872-886. doi:10.1121/1.1944647
- McAlpine, D.** (2005). Creating a sense of auditory space. *J. Physiol. Lond.* **566**, 21-28. doi:10.1113/jphysiol.2005.083113
- Michelsen, A. and Larsen, O. N.** (2008). Pressure difference receiving ears. *Bioinspir. Biomim.* **3**, 011001. doi:10.1088/1748-3182/3/1/011001
- Moiseff, A.** (1989). Binaural disparity cues available to the barn owl for sound localization. *J. Comp. Physiol. A* **164**, 629-636. doi:10.1007/BF00614505
- Owen, P.** (1850). On the communications between the cavity of the tympanum and the palate in the crocodilia (Gavials, Alligators and Crocodiles). *Philos. Trans. R. Soc. Lond.* **140**, 521-527. doi:10.1098/rstl.1850.0028
- Palanca-Castan, N. and Köppl, C.** (2015). Change in the coding of interaural time difference along the tonotopic axis of the chicken nucleus laminaris. *Front. Neural Circuits* **9**, 43. doi:10.3389/fncir.2015.00043
- Pinder, A. C. and Palmer, A. R.** (1983). Mechanical properties of the frog ear: vibration measurements under free- and closed-field acoustic conditions. *Proc. R. Soc. Lond. B Biol. Sci.* **219**, 371-396. doi:10.1098/rspb.1983.0079
- Poganiatz, I., Nelken, I. and Wagner, H.** (2001). Sound-localization experiments with barn owls in virtual space: influence of interaural time difference on head-turning behavior. *J. Assoc. Res. Otolaryngol.* **2**, 1-21. doi:10.1007/s101620010039
- Rosowski, J. J.** (1979). The interaural pathway of the pigeon and sound localization: Does the pigeon ear act as a differential pressure transducer? *PhD thesis*, University of Pennsylvania.
- Rosowski, J. J. and Saunders, J. C.** (1980). Sound transmission through the avian interaural pathways. *J. Comp. Physiol.* **136**, 183-190. doi:10.1007/BF00657532
- Schnyder, H. A., Vanderelst, D., Bartenstein, S., Firzlaff, U. and Luksch, H.** (2014). The avian head induces cues for sound localization in elevation. *PLoS ONE* **9**, e112178. doi:10.1371/journal.pone.0112178
- Schwartzkopf, J.** (1952). Untersuchungen über die Arbeitsweise des Mittelohres und das Richtungshören der Singvögel unter Verwendung von Cochlea-Potentialen. *Zeitschrift für vergleichende Physiologie* **34**, 46-68. doi:10.1007/BF00298942
- Sterbing, S. J., Hartung, K. and Hoffmann, K.-P.** (2003). Spatial tuning to virtual sounds in the inferior colliculus of the guinea pig. *J. Neurophysiol.* **90**, 2648-2659. doi:10.1152/jn.00348.2003
- Tollin, D. J. and Koka, K.** (2009). Postnatal development of sound pressure transformations by the head and pinnae of the cat: Binaural characteristics. *J. Acoust. Soc. Am.* **126**, 3125-3136. doi:10.1121/1.3257234
- Viete, S., Peña, J. L. and Konishi, M.** (1997). Effects of interaural intensity difference on the processing of interaural time difference in the owl's nucleus laminaris. *J. Neurosci.* **17**, 1815-1824. doi:10.1523/JNEUROSCI.17-05-01815.1997
- von Campenhausen, M. and Wagner, H.** (2006). Influence of the facial ruff on the sound-receiving characteristics of the barn owl's ears. *J. Comp. Physiol. A Neuroethol. Sens. Neural Behav. Physiol.* **192**, 1073-1082. doi:10.1007/s00359-006-0139-0
- Vonderschen, K. and Wagner, H.** (2014). Detecting interaural time differences and remodeling their representation. *Trends Neurosci.* **37**, 289-300. doi:10.1016/j.tins.2014.03.002
- Wada, Y.** (1924). Beiträge zur vergleichenden Physiologie des Gehörorgans. *Pflüg. Arch. Eur. J. Physiol.* **202**, 46-69. doi:10.1007/BF01723478
